# Supplementary material
Source: Royal Society of Chemistry journal article supplement (doi:10.1039/d6tb00816j)
Supplement: d6tb00816j1.pdf [file d6tb00816j1.pdf]

## Supplementary Information

### Controlling PEDOT:PSS electropolymerization for label-free optical recording of bioelectric potentials

Xuchen Ren<sup>1†</sup>, Jitong Ren<sup>2†</sup>, Yu Shi<sup>3</sup>, Alexandra Kuhlman-Schneider<sup>1</sup>, Koney Eungkon Kim<sup>1</sup>, Zixin Zhang<sup>1</sup>, Yuecheng Peter Zhou<sup>1,2,4,5,6\*</sup>

<sup>1</sup> Department of Materials Science and Engineering, The Grainger College of Engineering, University of Illinois Urbana-Champaign, Urbana, IL, USA.

<sup>2</sup> Department of Chemical and Biomolecular Engineering, College of Liberal Arts & Sciences, University of Illinois Urbana-Champaign, Urbana, IL, USA.

<sup>3</sup> Department of Chemistry, College of Liberal Arts & Sciences, University of Illinois Urbana-Champaign, Urbana, IL, USA.

<sup>4</sup> Department of Bioengineering, The Grainger College of Engineering, University of Illinois Urbana-Champaign, Urbana, IL, USA.

<sup>5</sup> Materials Research Laboratory, University of Illinois Urbana-Champaign, Urbana, IL, USA.

<sup>6</sup> Beckman Institute for Advanced Science and Technology, University of Illinois Urbana-Champaign, Urbana, IL, USA.

† Equal contributions

\* To whom correspondence may be addressed. Email: [zhou62@illinois.edu](mailto:zhou62@illinois.edu)

## Supplementary Text

### 1. Surface treatment of indium tin oxide (ITO)-coated glass

The surface morphology of ITO glass using different surface treatment methods was characterized by atomic force microscopy (AFM) (**Supplementary Figure 3a**). Untreated clean ITO glass (dish soap water, acetone, isopropyl alcohol) exhibits relatively smooth surfaces (RMS roughness of ~0.6 nm) and largest grain size. UV-Ozone treatment leads to slightly reduced grain size but an increased RMS roughness of ~0.8 nm. Oxygen plasma treatment results in a more fragmented surface morphology with the smallest grain size but highest RMS roughness of ~1.0 nm. Details of ITO glass treatments before electropolymerization are described in the Methods section.

## Supplementary Figures

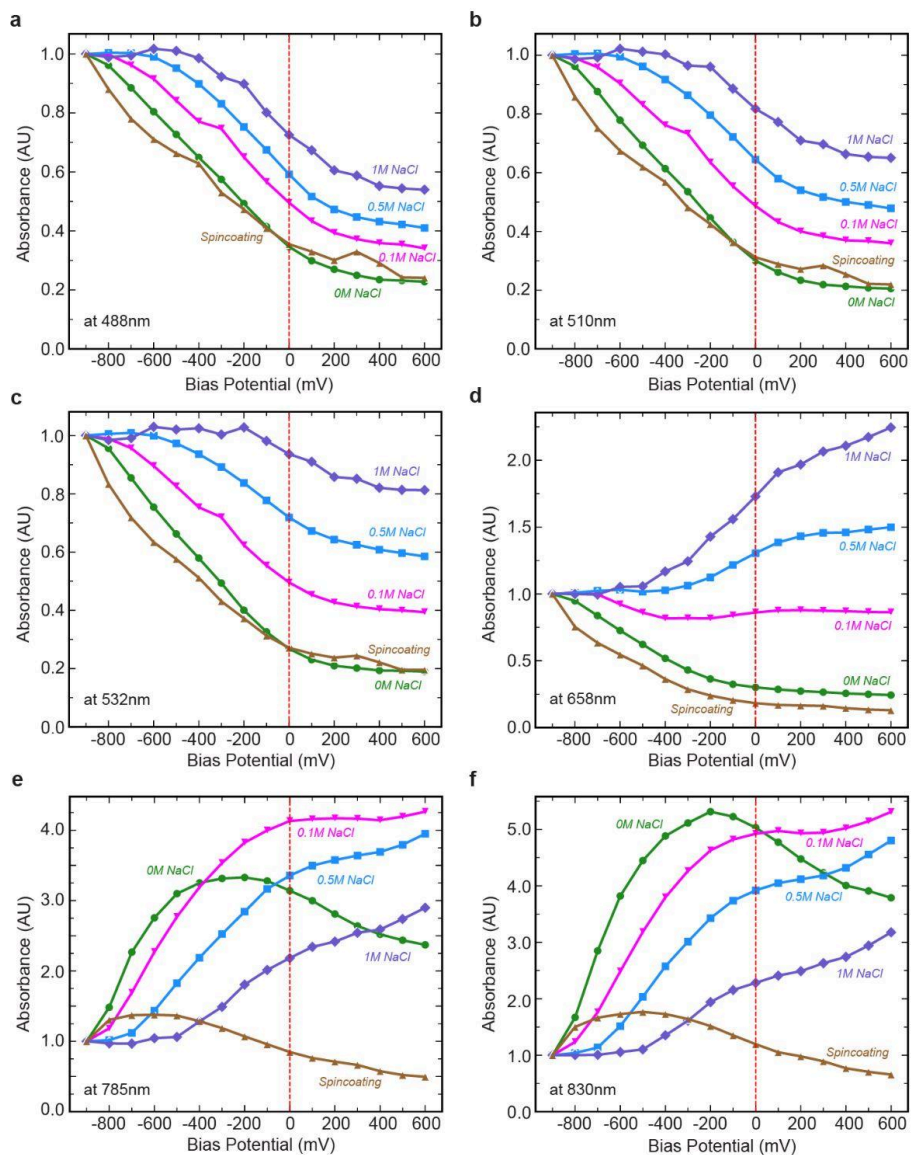

**Supplementary Figure 1. Voltage-dependent absorbance change of PEDOT:PSS thin films at different wavelengths.** Voltage-dependent absorbance changes of PEDOT:PSS films electropolymerized under different NaCl concentrations at commonly-used laser wavelengths: (a) 488 nm, (b) 510 nm, (c) 532 nm, (d) 658 nm, (e) 785 nm, and (f) 830 nm. The dashed vertical lines indicate 0 mV (vs. Ag/AgCl). A reverse in the voltage-dependent absorbance change trend is observed at higher laser wavelengths. Data for spin-coated PEDOT:PSS film from commercial suspension is included for comparison.

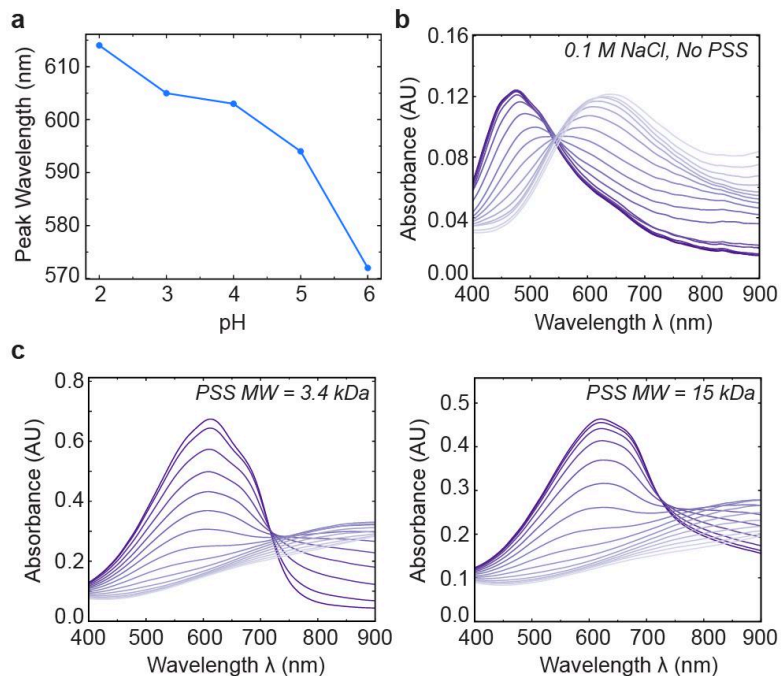

**Supplementary Figure 2. Influence of pH, NaCl, and PSS molecular weight on the spectroelectrochemistry of electropolymerized PEDOT:PSS films.** (a)  $\pi$ - $\pi^*$  absorption peak wavelength as a function of electrolyte pH during electropolymerization. (b) Vis-NIR spectroelectrochemistry of PEDOT:Cl films electropolymerized with 0.1 M NaCl without PSS. (c) Vis-NIR spectroelectrochemistry of PEDOT:PSS films electropolymerized with 3.4 kDa and 15 kDa PSS (0 M NaCl). All measurements were performed from  $-900$  mV to  $+600$  mV versus Ag/AgCl in HEPES-buffered Tyrode's solution.

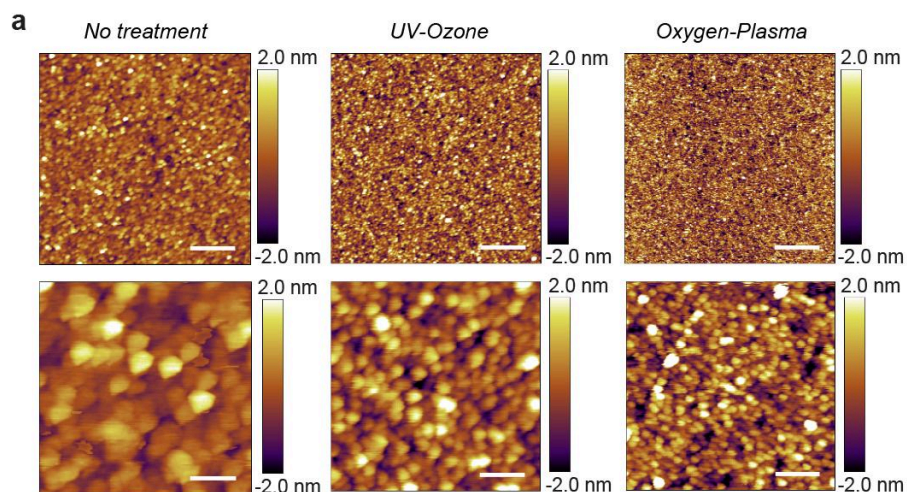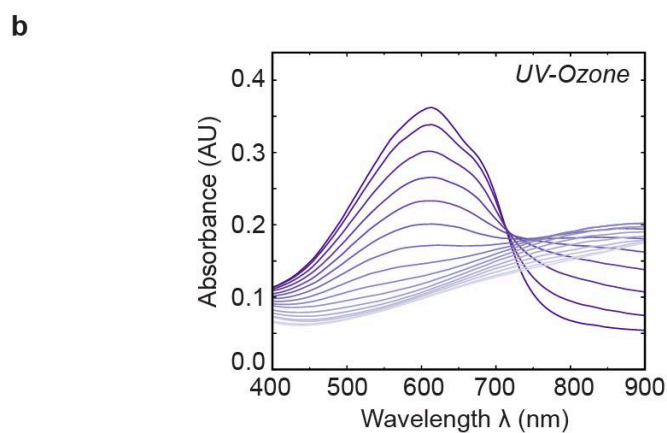

**Supplementary Figure 3. Influence of ITO glass surface treatment on the spectroelectrochemistry of electropolymerized PEDOT:PSS films.** (a) Atomic force microscopy (AFM) images of ITO glass substrates under different surface treatment conditions. Scale bar = 1  $\mu\text{m}$  (top row) and 200 nm (bottom row). (b) Vis-NIR spectroelectrochemistry of PEDOT:PSS films electropolymerized on UV-Ozone-treated ITO glass with 0 M NaCl.

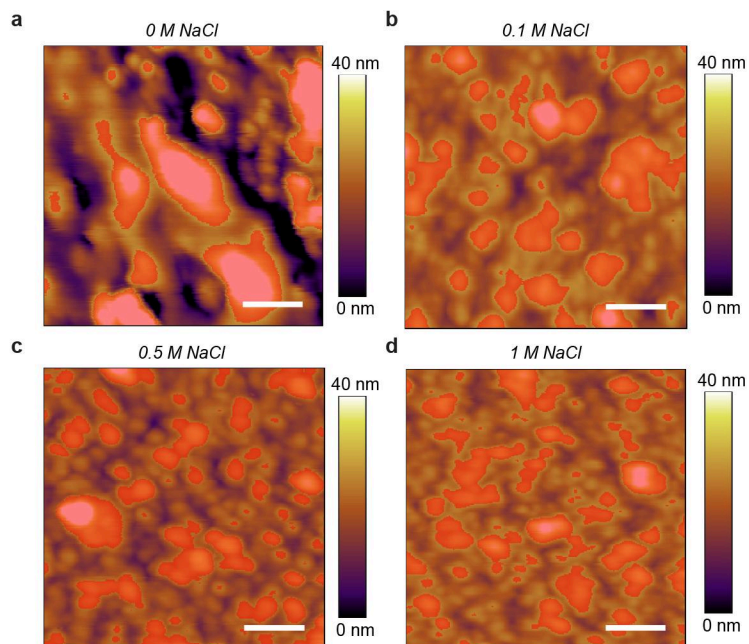

**Supplementary Figure 4. Grain analysis on AFM images.** A 75% rank was used as a fixed threshold for all samples. The area covered with red masks are suggested as “grains” in this analysis. PEDOT:PSS thin films electropolymerized with (a) 0 M, (b) 0.1 M, (c) 0.5 M, and (d) 1 M NaCl shows mean equivalent radii of 48.2 nm, 37.9 nm, 25.9 nm, and 26.8 nm, respectively.

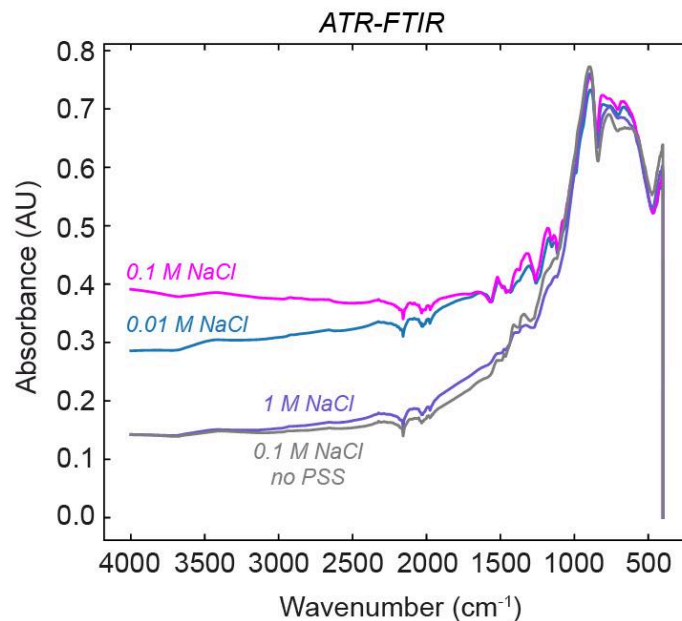

**Supplementary Figure 5. ATR-FTIR spectra of PEDOT:PSS films electropolymerized under different NaCl concentrations.** Characteristic bands are observed at  $\sim 1520\text{ cm}^{-1}$ , corresponding to C=C/C-C stretching of the thiophene ring. The region between  $\sim 1100\text{-}1250\text{ cm}^{-1}$  is dominated by C-O-C stretching vibrations of the ethylenedioxy groups with contributions of  $\text{-SO}_3^-$  from PSS. Features around  $\sim 970\text{-}1000\text{ cm}^{-1}$  are mainly attributed to C-S stretching modes of the thiophene ring<sup>1</sup>. Qualitatively, 1 M NaCl and 0.1 M with no PSS conditions show largely reduced contributions from PSS. A baseline drift across the spectra is observed, arising from the wavelength-dependent infrared absorption of the underlying ITO glass substrate.

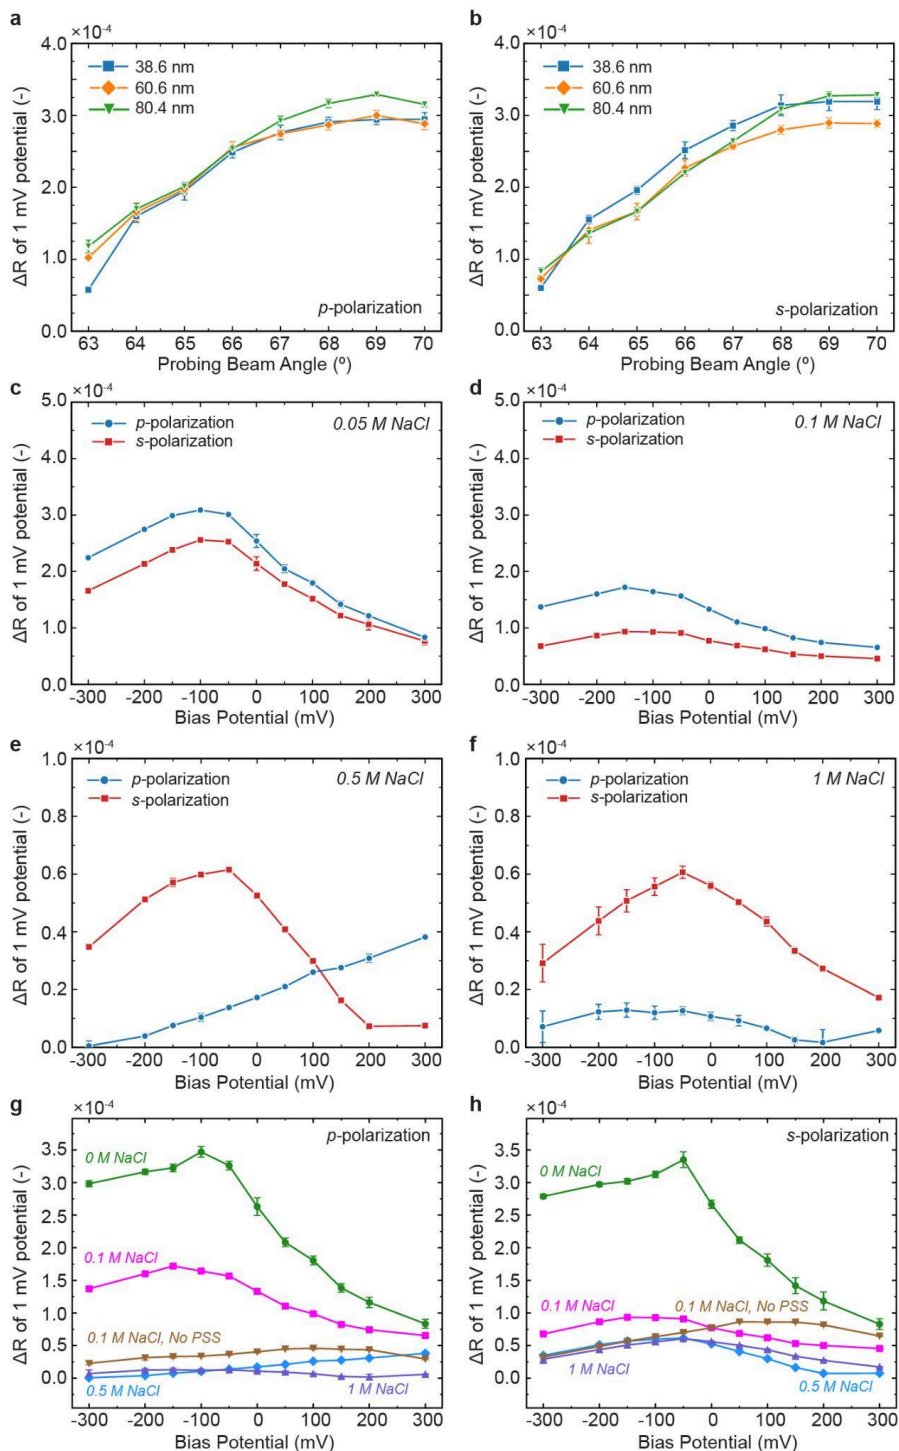

**Supplementary Figure 6. Influence of probing beam incident angle, film thickness, and bias potential on ECORE signal in response to 1 mV, 1 Hz squarewave potential.** Reflectance change ( $\Delta R$ ) as a function of probing beam incidence angle for PEDOT:PSS films with different thicknesses when measured using (a)  $p$ -polarized and (b)  $s$ -polarized light. Bias-potential dependence of  $\Delta R$  measured under  $p$ -polarized and  $s$ -polarized light for PEDOT:PSS thin films electropolymerized with (c) 0.05 M, (d) 0.1 M, (e) 0.5 M, and (f) 1 M NaCl.  $\Delta R$  of electropolymerized PEDOT:PSS and PEDOT:Cl films in

response to 1 mV, 1 Hz squarewave potential measured using (g) *p*-polarized and (h) *s*-polarized light under different bias potentials. Data are presented as mean  $\pm$  SD.

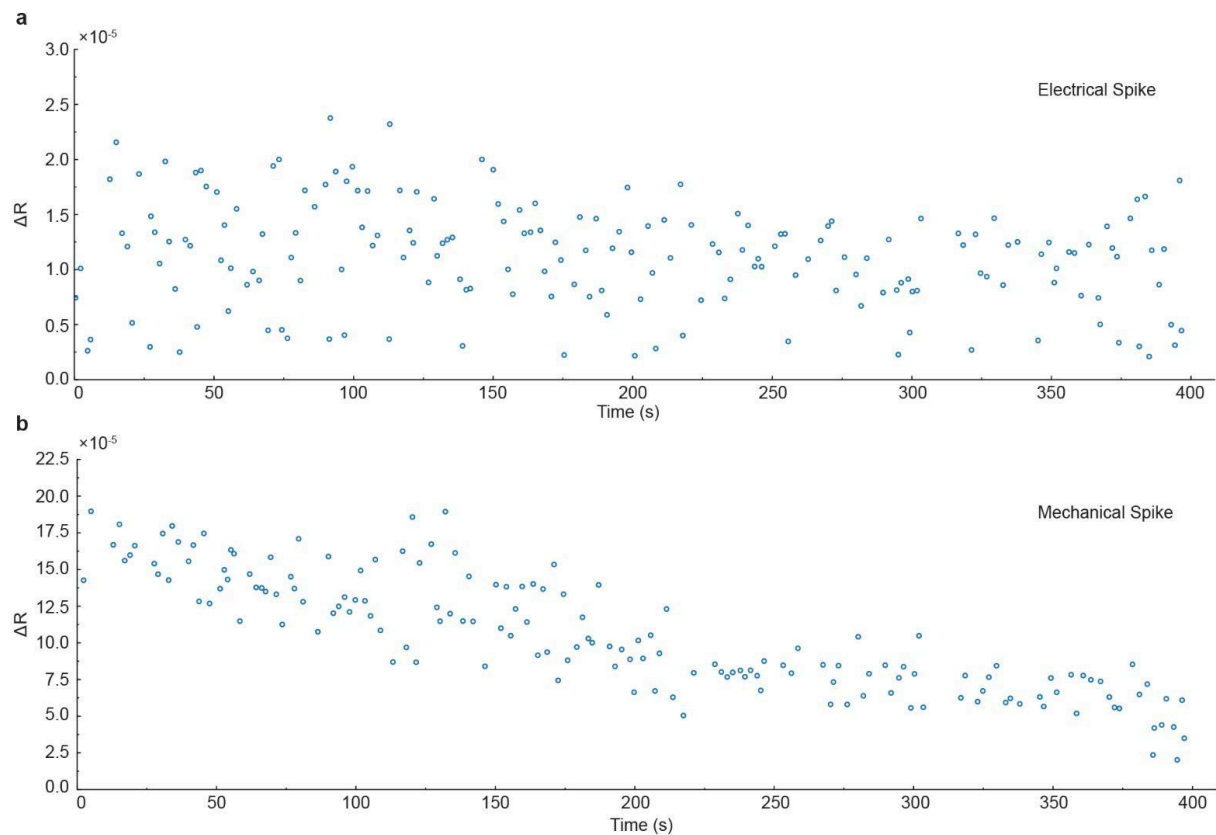

**Supplementary Figure 7. Electrical and mechanical spike amplitudes of E10 chicken hearts recorded by ECORE with blebbistatin.** Reflectance change,  $\Delta R$ , as a function of time for (a) field potential spikes and (b) mechanical contraction spikes recorded from isolated E10 chicken hearts after 15 min incubation with blebbistatin. Each point represents a detected individual peak.

## Supplementary Tables

| <i>Sample</i> | PEDOT<br>2p 3/2 | PEDOT<br>2p 1/2 | PEDOT <sup>+</sup><br>2p 3/2 | PEDOT <sup>+</sup><br>2p 1/2 | PSS<br>2p 3/2 | PSS<br>2p 1/2 | R.S.F<br>(S) | Cl <sup>-</sup> 2p<br>3/2 | Cl <sup>-</sup> 2p<br>1/2 | C-Cl<br>2p 3/2 | C-Cl<br>2p 1/2 | R.S.F<br>(Cl) |
|---------------|-----------------|-----------------|------------------------------|------------------------------|---------------|---------------|--------------|---------------------------|---------------------------|----------------|----------------|---------------|
| 0.1 M, no PSS | 10627.6         | 5313.8          | 5098.7                       | 2549.4                       | 1650.4        | 825.2         | 1.677        | 1101.3                    | 550.7                     | 5709.6         | 2854.8         | 2.285         |
| 0.01 M        | 3133.3          | 1566.7          | 2958.4                       | 1479.2                       | 7430.0        | 3715.0        | 1.677        | 0.0                       | 0.0                       | 155.8          | 77.9           | 2.285         |
| 0.05 M        | 5143.0          | 2571.5          | 3899.0                       | 1949.5                       | 7872.1        | 3936.1        | 1.677        | 0.0                       | 0.0                       | 829.5          | 414.8          | 2.285         |
| 0.1 M         | 4092.3          | 2046.2          | 3395.4                       | 1697.7                       | 7786.7        | 3893.4        | 1.677        | 46.2                      | 23.1                      | 722.7          | 361.4          | 2.285         |
| 0.5 M         | 3803.6          | 1901.8          | 2778.5                       | 1389.3                       | 6838.1        | 3419.1        | 1.677        | 670.5                     | 335.3                     | 1275.2         | 637.6          | 2.285         |
| 1 M           | 4162.7          | 2081.4          | 3102.1                       | 1551.1                       | 9953.7        | 4976.9        | 1.677        | 0.0                       | 0.0                       | 1673.0         | 836.5          | 2.285         |

**Supplementary Table 1. Fitted XPS peak areas of PEDOT:PSS films electropolymerized under different NaCl concentrations.** Peak areas corresponding to PEDOT (2p), PEDOT<sup>+</sup> (2p), PSS (2p), and Cl-related species (Cl<sup>-</sup> 2p and C-Cl 2p) are listed for each sample, including a PSS-free control. Relative sensitivity factors (R.S.F.) for both elements used for quantification are also listed.

| <i>Sample</i> | PSS/PEDOT | Cl/PEDOT | Cl/PSS |
|---------------|-----------|----------|--------|
| 0.1 M, no PSS | 0.105     | 0.318    | 3.029  |
| 0.01 M        | 1.220     | 0.019    | 0.015  |
| 0.05 M        | 0.871     | 0.067    | 0.077  |
| 0.1 M         | 1.040     | 0.075    | 0.072  |
| 0.5 M         | 1.039     | 0.217    | 0.209  |
| 1 M           | 1.370     | 0.169    | 0.123  |

**Supplementary Table 2. Atomic ratios derived from XPS analysis of PEDOT:PSS films.** Calculated ratios of PSS/PEDOT, Cl/PEDOT, and Cl/PSS for films electropolymerized under different NaCl concentrations, including a PSS-free control.

## References

1. Sriprachuabwong, C. *et al.* Inkjet-printed graphene-PEDOT:PSS modified screen printed carbon electrode for biochemical sensing. *J. Mater. Chem.* **22**, 5478–5485 (2012).
